# Supplementary material
Source: Research Square preprint supplement (doi:10.21203/rs.3.rs-9409709/v1)
Supplement: Supplementary file 1 [file 782c9f8e713d1fc7f8657388.docx]

**Note**

This study adopts NetLogo 6.1.0 to construct a dynamic simulation model of entrepreneurial networks. Three types of entrepreneurial networks are established, and thresholds are set to identify whether enterprises learn and adopt entrepreneurial behaviors. This approach simulates the evolution of entrepreneurship and transmission mechanisms among platform enterprises and examines the different effects of network structures on the evolution of entrepreneurial mechanisms. The whole research includes two successive stages: simulation design and simulation experiment.

**The first part is simulation design.** First, this paper classifies entrepreneurial networks into hub‑and‑spoke, hybrid, and market‑oriented networks based on relevant research and platform enterprise characteristics. These network types are matched and coupled with corresponding complex network models to form the overall network architecture, and the basic attributes of these models are clearly described. Second, this paper constructs model algorithms and rules. It uses the threshold diffusion model to explain whether enterprises in the entrepreneurial network accept entrepreneurial behaviors and realize entrepreneurship through organizational learning. Meanwhile, the transmission model based on the neighbor effect is adopted to analyze the transmission probability. By setting conditions and parameters for transmission sources and the initial number of entrepreneurial enterprises, this study simulates the evolutionary results of the mechanism under different scenarios.

**The second part focuses on simulation implementation.** First, this study carries out simulations for the three basic network models and compares their structural characteristics by analyzing changes in degree distribution. Then, based on the conditions and parameters defined in the simulation design, it further examines and discusses how each variable influences the evolutionary outcomes of the mechanism under different transmission sources and different initial numbers of entrepreneurial enterprises.

Introduction: NetLogo 6.1.0 is a widely used free and open-source software for complex system modeling and multi-agent simulation. It is developed by the Center for Connected Learning and Computer-Based Modeling (CCL) at Northwestern University in the United States.

**Appendix: Source Code of the Simulation Program**

extensions[nw csv]

breed[nodes node]

links-own

[ link-type]

turtles-own

[

entrepreneur?

fact-threshold

threshold

entrepreneur-times

]

globals

[

last-time-entrepreneur-count

current-time-entrepreneur-count

CV

total-entrepreneur

]

to setup

clear-all

ask patches [set pcolor white]

if mode = "ER-mode"

[ setup-ER-nodes

]

if mode = "BA-mode"

[

setup-ba-network

]

if mode = "LN-mode"

[

setup-LN-network

if count turtles < initial-number-of-nodes

[

add-node-to-LN-network

]

]

ask turtles

[

set entrepreneur? false

]

reset-ticks

end

to initial-network

wait 0.01

if count turtles = total-number-of-nodes

[

reset-ticks

set-current-plot "传导放大系数"

clear-plot

set-current-plot "传导成功率"

clear-plot

stop

]

if mode = "ER-mode"

[

add-node-to-ER-network

]

if mode = "BA-mode"

[

add-node-to-ba-network

]

if mode = "LN-mode"

[

if count turtles < total-number-of-nodes

[

add-node-to-LN-network

if ticks mod 3 = 0

[layout]

]

]

tick

end

to go

if ticks = 0

[

select-first-entrepreneur-company

]

if count turtles with [color = red] = count turtles

[stop]

if ticks = stop-ticks

[

stop

]

set last-time-entrepreneur-count count turtles with [color = red]

……

to calculate-cv

let index 0

repeat repeat-times

[reset-ticks

ask links with [link-type = 1] [die]

ask turtles [

set color green

set entrepreneur? false

set fact-threshold 0

set threshold random 100

]

repeat stop-ticks

[

go

]

ask turtles with [color = red]

[

set entrepreneur-times entrepreneur-times + 1

]

set index index + 1

let file-name (word "data/output-entrepreneur-times" index ".csv")

let out-list [[ "turtle-who" "entrepreneur-times "]]

……

to spread

let n count turtles with [entrepreneur?]

ask turtles

[

let m count link-neighbors with [entrepreneur?]

let s(n - m)

ifelse fact-threshold < threshold

[

set fact-threshold (0.75 * m + 0.5 * s)

; show fact-threshold

]

[

if random-float 1 < 0.1

[

set entrepreneur? true

set color red

]

……

to calculate-degree-set-threshold

ask turtles

[

set threshold random 100

set fact-threshold 0

]

end

to select-first-entrepreneur-company

if initial-entrepreneur-mode = "max-degree"

[

ask max-one-of turtles[ count link-neighbors ]

[

set entrepreneur? true

set color red

set size 1.5

set fact-threshold 1

]

]

……

if initial-entrepreneur-mode = "choose-percentage"

[

ask n-of (choose-percentage / 100 * count turtles ) turtles

[

set entrepreneur? true

set color red

set size 1.5

set fact-threshold 1

]

]

end

to setup-LN-network

create-turtles 2

[

set color green

set size 1.5

set shape "circle"

setxy (random-xcor * 0.9) (random-ycor * 0.9)

create-links-with other turtles

]

end

to add-node-to-LN-network

create-turtles 1

[

set color green

set size 1.5

set shape "circle"

set entrepreneur? false

setxy (random-xcor * 0.9) (random-ycor * 0.9)

if count other turtles > 1

[

while [count link-neighbors = 0]

[

ask other turtles

……

]

end

to add-node-to-ER-network

if count turtles < total-number-of-nodes

[

create-nodes 1

[

setxy (random-xcor * 0.9) (random-ycor * 0.9)

set shape "circle"

set size 1.5

set entrepreneur? false

……

end

to add-node-to-ba-network

if total-number-of-nodes - count turtles > 0

[

make-node find-partner

layout

]

end

to setup-ER-nodes

create-nodes initial-number-of-nodes

[

setxy (random-xcor * 0.9) (random-ycor * 0.9)

set shape "circle"

set size 1.5

set entrepreneur? false

set color green

let choice one-of (other nodes with [not link-neighbor? myself])

if choice != nobody [ create-link-with choice ]

]

end

to setup-ba-network

make-node nobody ;; first node, unattached

make-node turtle 0 ;; second node, attached to first node

repeat initial-number-of-nodes - 2

[

make-node find-partner

layout

]

end

;;;;;;;;;;;;;;;;;;;;;;;;;;;;;

;;; for BA network;;

;;;;;;;;;;;;;;;;;;;;;;;;;;;;;

;; used for creating a new node

to make-node [old-node]

create-turtles 1

……

end

to-report find-partner

report [one-of both-ends] of one-of links

end

to resize-nodes

ifelse all? turtles [size <= 1.5]

[

;; a node is a circle with diameter determined by

;; the SIZE variable; using SQRT makes the circle's

;; area proportional to its degree

ask turtles [ set size sqrt count link-neighbors ]

]

[

ask turtles [ set size 1.5 ]

]

end

to layout

;; the number 3 here is arbitrary; more repetitions slows down the

;; model, but too few gives poor layouts

repeat 3 [

;; the more turtles we have to fit into the same amount of space,

;; the smaller the inputs to layout-spring we'll need to use

let factor sqrt count turtles

;; numbers here are arbitrarily chosen for pleasing appearance

layout-spring turtles links (1 / factor) (7 / factor) (1 / factor)

display ;; for smooth animation

]

;; don't bump the edges of the world

let x-offset max [xcor] of turtles + min [xcor] of turtles

let y-offset max [ycor] of turtles + min [ycor] of turtles

;; big jumps look funny, so only adjust a little each time

set x-offset limit-magnitude x-offset 0.1

set y-offset limit-magnitude y-offset 0.1

ask turtles [ setxy (xcor - x-offset / 2) (ycor - y-offset / 2) ]

end

to-report limit-magnitude [number limit]

if number > limit [ report limit ]

if number < (- limit) [ report (- limit) ]

report number

End
